# Supplementary material
Source: PubMed Central journal article supplement (PMC4973337)
Supplement: cr201688x1.pdf [file cr201688x1.pdf]

**Table S1. X-ray Statistics for AsCpf1-crRNA-DNA Ternary Complex**

| <b>Crystal</b>                           | <b>AsCpf1-crRNA-DNA</b>          |
|------------------------------------------|----------------------------------|
| Beam line                                | APS-ID24C                        |
| Wavelength                               | 0.9792                           |
| Space group                              | P4 <sub>1</sub> 2 <sub>1</sub> 2 |
| Unit cell                                |                                  |
| a, b, c (Å)                              | 197.74, 197.74, 125.21           |
| $\alpha$ , $\beta$ , $\gamma$ (°)        | 90.0, 90.0, 90.0                 |
| Resolution (Å)                           | 50-3.29 (3.43-3.29) <sup>a</sup> |
| R <sub>merge</sub>                       | 0.101 (1.684)                    |
| I/ $\sigma$ (I)                          | 14.1 (1.1)                       |
| Completeness (%)                         | 99.5 (96.6)                      |
| CC(1/2)                                  | 0.996 (0.538)                    |
| Redundancy                               | 5.3 (5.5)                        |
| Number of unique reflections             | 37141                            |
| R <sub>work</sub> /R <sub>free</sub> (%) | 21.6/25.5                        |
| Number of non-H atoms                    | 11206                            |
| Average B factors (Å <sup>2</sup> )      |                                  |
| Protein                                  | 168                              |
| DNA                                      | 130                              |
| RNA                                      | 144                              |
| R.m.s. deviations                        |                                  |
| Bond lengths (Å)                         | 0.009                            |
| Bond angles (°)                          | 1.228                            |
| Ramachandran plot                        |                                  |
| % favoured                               | 96.21                            |
| % allowed                                | 3.79                             |
| % outliers                               | 0                                |

<sup>a</sup> Highest resolution shell (in Å) shown in parentheses.
