# Supplementary material
Source: PubMed Central journal article supplement (PMC4973337)
Supplement: cr201688x2.pdf [file cr201688x2.pdf]

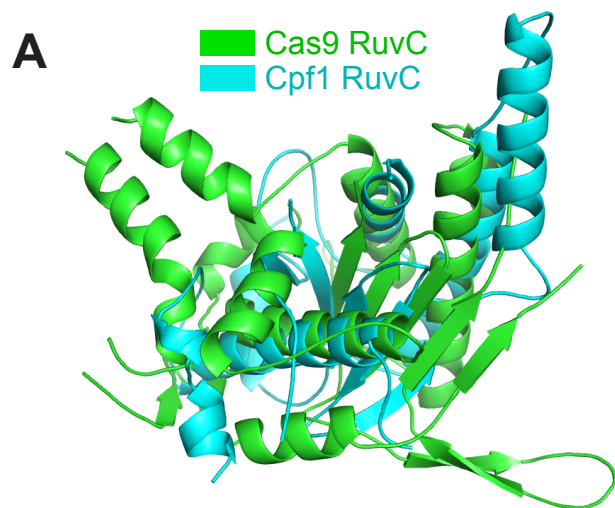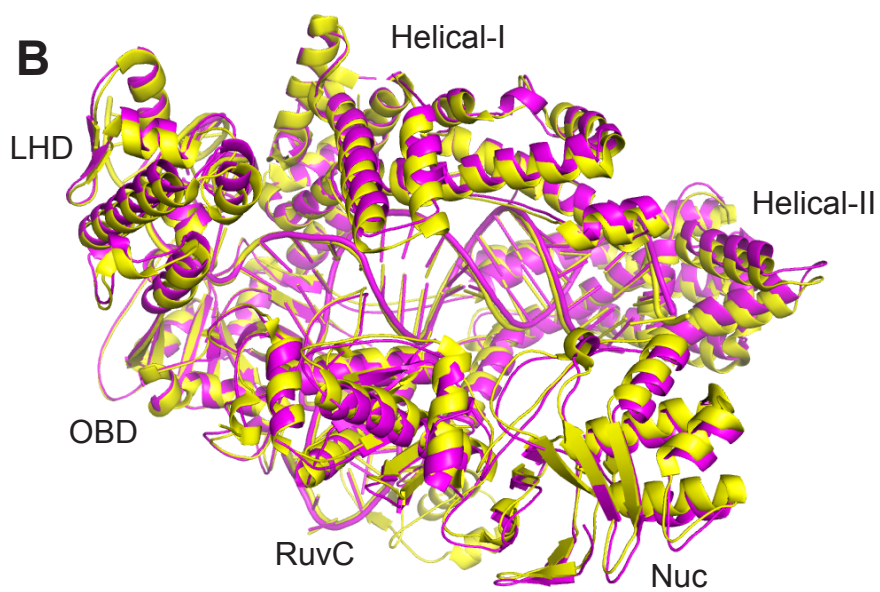

**Figure S1**

**Figure S1. Structural comparison of RuvC domains of Cpf1 and Cas9, and overlay of AsCpf1<sup>E993A</sup>-RNA-DNA with AsCpf1<sup>WT</sup>-RNA-DNA ternary complexes.**

**(A)** Structural superposition of Cas9-RuvC (in green) and Cpf1-RuvC (in cyan) domains. **(B)** Overall structure superposition of AsCpf1<sup>E993A</sup>-RNA-DNA (this study, shown in magenta) and AsCpf1<sup>WT</sup>-RNA-DNA (PDB: 5B43, shown in yellow).
