# Supplementary material
Source: PubMed Central journal article supplement (PMC4973337)
Supplement: cr201688x3.pdf [file cr201688x3.pdf]

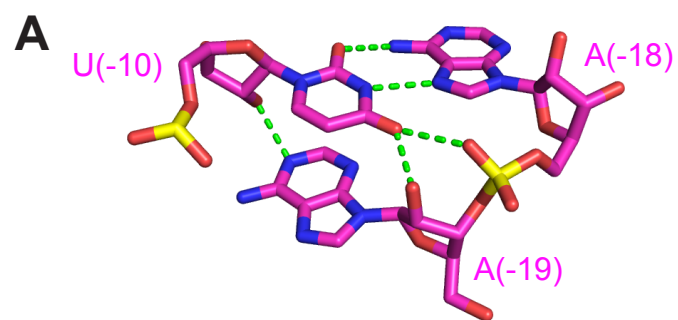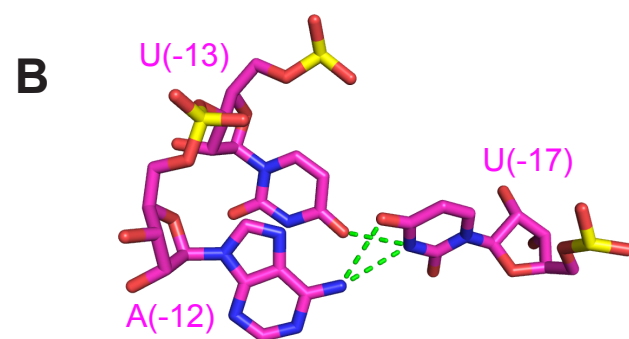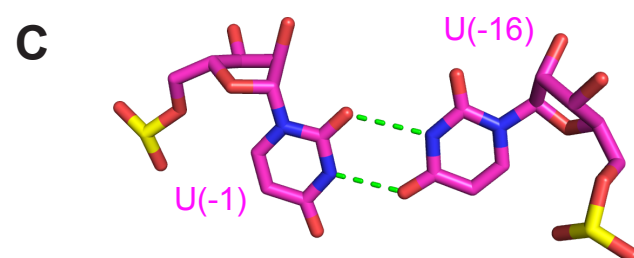

**Figure S2**

**Figure S2. Intramolecular interactions of crRNA direct repeat region.**

Close-up view of **(A)** the reverse Hoogsteen U(-10)-A(-18) base pair, **(B)** the U(-17)-U(-12)-U(-13) interactions, and **(C)** the U(-1)-U(-16) base pair. The hydrogen bonds are shown in green dashed lines.
