# Supplementary material
Source: PubMed Central journal article supplement (PMC4973337)
Supplement: cr201688x4.pdf [file cr201688x4.pdf]

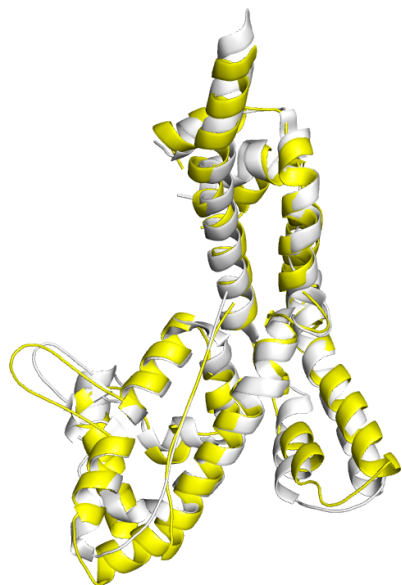

**Helical-I**

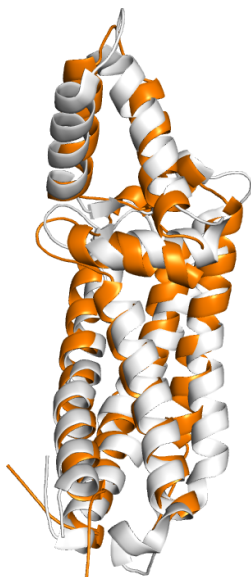

**Helical-II**

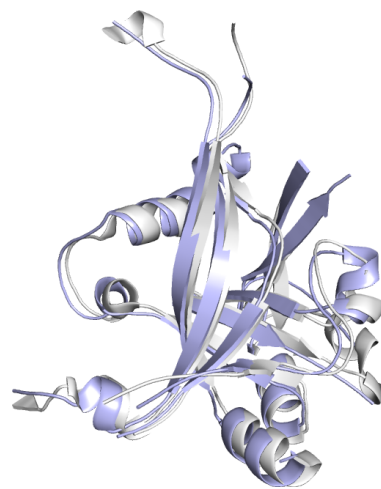

**OBD**

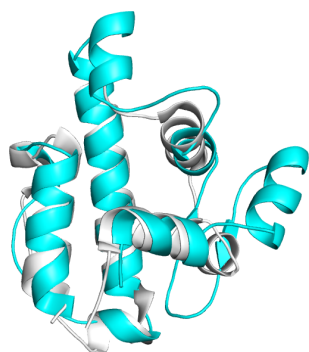

**LHD**

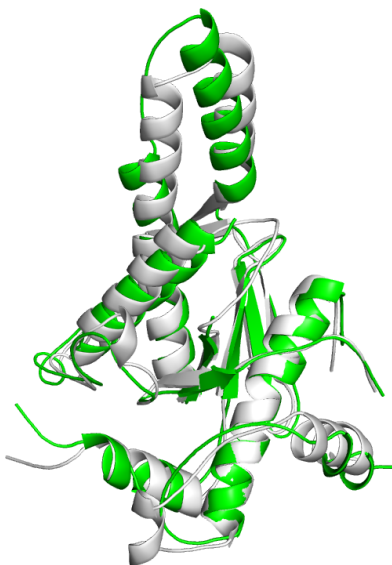

**RuvC**

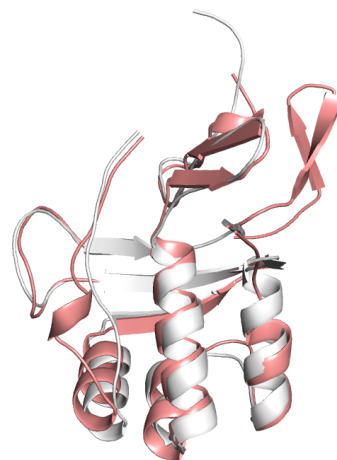

**Nuc**

**Figure S3**

**Figure S3. Structural comparison of the individual domains from AsCpf1 ternary complex (this study) and the LbCpf1 binary complex (PDB: 5ID6).**

All the domains are shown in ribbon representation. The color code for AcCpf1 is similar to Fig. 1C. LbCpf1 domains are shown in silver.
