# Supplementary material
Source: PubMed Central journal article supplement (PMC4973337)
Supplement: cr201688x5.pdf [file cr201688x5.pdf]

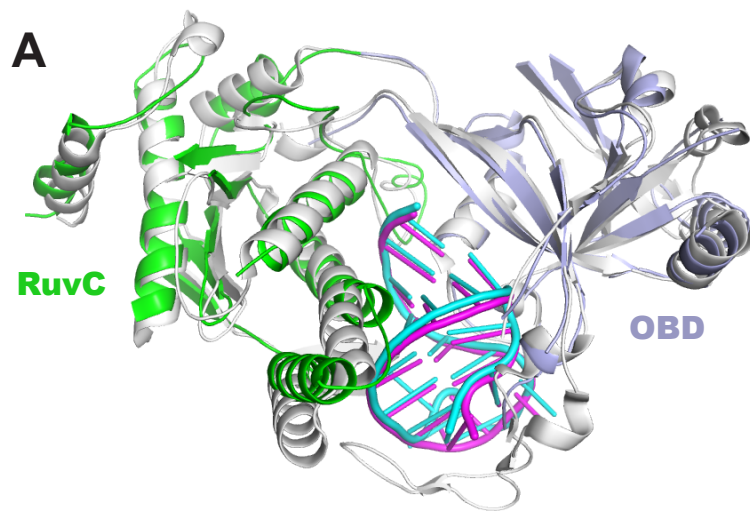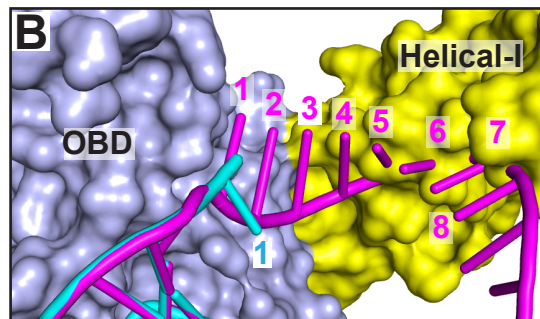

**Figure S4**

**Figure S4. Structural comparison of AsCpf1-RNA-DNA ternary and LbCpf1-RNA binary complexes.**

**(A)** Structural overlay of OBD, RuvC and the pseudoknot region of the bound RNA between crRNA-bound binary (protein shown in silver, RNA shown in cyan) and crRNA-DNA-bound ternary (color-coded as defined in Fig. 1C) states. **(B)** Modeling of residues of the seed segment crRNA (in magenta) from the Cpf1-crRNA-DNA target-bound ternary complex into the structure of the binary complex with bound crRNA (in cyan). Note that the A5-C8 nucleotides clash with the Helical-I domain of Cpf1 in the binary complex.
