# Supplementary material
Source: PubMed Central journal article supplement (PMC4973337)
Supplement: cr201688x6.pdf [file cr201688x6.pdf]

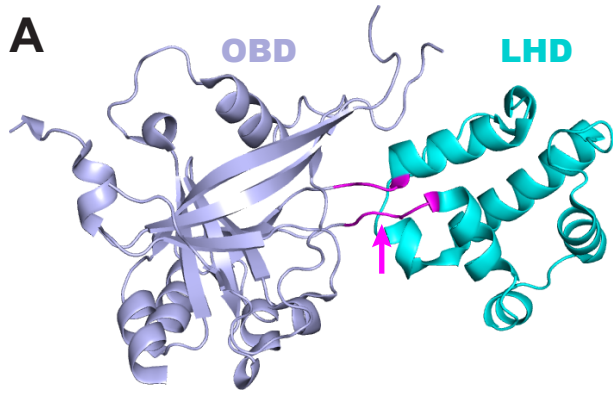

Cpf1-crRNA binary complex

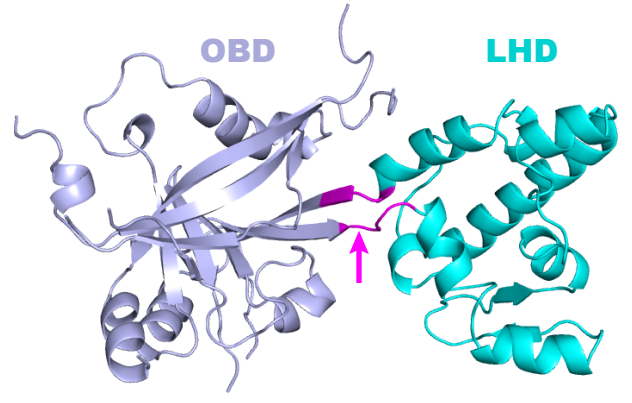

Cpf1-crRNA-DNA ternary complex

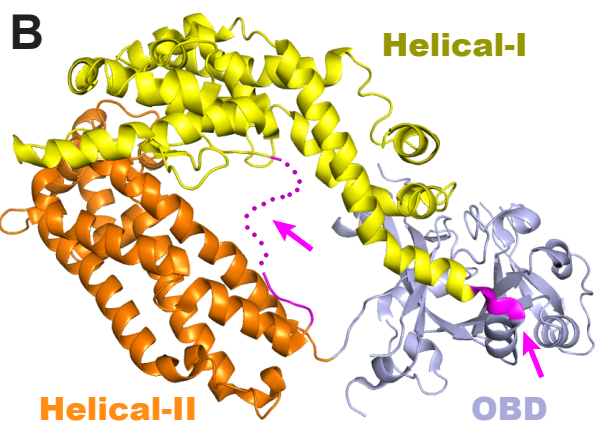

Cpf1-crRNA binary complex

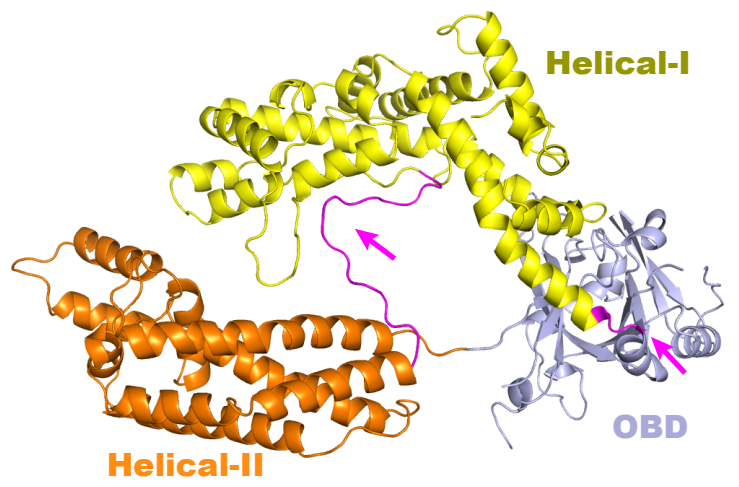

Cpf1-crRNA-DNA ternary complex

**Figure S5**

**Figure S5. Hinge regions of LHD and Helical-I with their connecting domains.**

**(A)** The hinge regions (magenta, indicated by arrows) between LHD (cyan) with OBD (light-blue) in the Cpf1 binary (left panel) and Cpf1 ternary (right panel) complexes. **(B)** The hinge regions (magenta, indicated by arrows) between Helical-I (yellow) with OBD (light-blue) and Helical-II (orange) in the Cpf1 binary (left panel) and Cpf1 ternary (right panel) complexes. The disordered loop in the binary complex is shown as dashed lines.
