# Supplementary material
Source: PubMed Central journal article supplement (PMC4973337)
Supplement: cr201688x7.pdf [file cr201688x7.pdf]

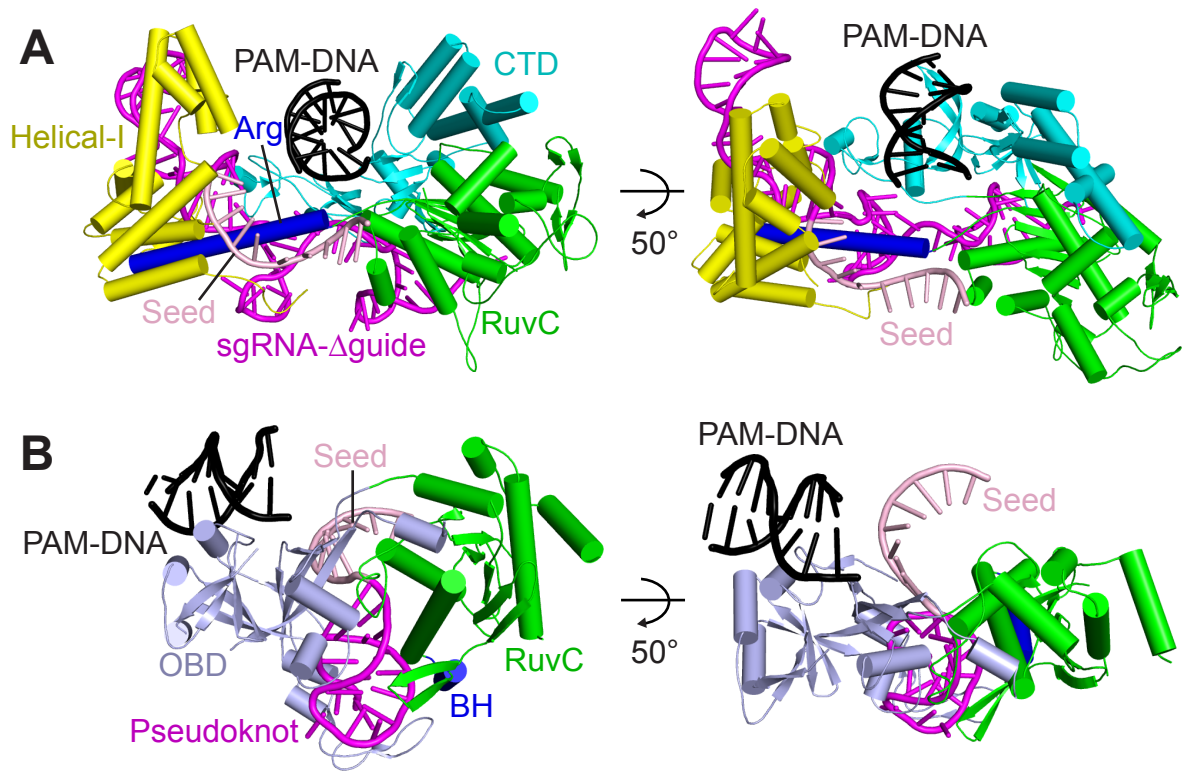

**Figure S6**

**Figure S6. Distinct contributions of crRNA (Cpf1) and sgRNA (Cas9) for target recognition.**

**(A)** The structure of Cas9 sgRNA-guide and its interaction with Cas9 domains in the Cas9-sgRNA binary complex (PDB: 4ZT0). The PAM-duplex is a superposed model from Cas9-sgRNA-DNA ternary complex (PDB: 4UN3). **(B)** The structure of crRNA pseudoknot and its interaction with Cpf1 domains in the Cpf1-crRNA binary complex (PDB: 5ID6). The PAM-duplex and A-form seed sequence are superposed models from Cpf1-crRNA-DNA ternary complex.
